# Supplementary material for: Remarkable colorimetric sensing behavior of pyrazole-based chemosensor towards Cu( ii ) ion detection: synthesis, characterization and theoretical investigations
Source: Royal Society of Chemistry journal article supplement (doi:10.1039/c8ra02905a), 2018-01-01
Supplement: c8ra02905a1.pdf [file c8ra02905a1.pdf]

## Supporting Information

### Remarkable Colorimetric Sensing Behavior of Pyrazole-based Chemosensor Towards Cu(II) Ion Detection: Synthesis, Characterization and Theoretical Investigations

Nagaraj Nayak,<sup>a</sup> Kollur Shiva Prasad,<sup>\*</sup> <sup>a</sup>  Renjith Raveendran Pillai,<sup>b</sup> Stevan Armaković,<sup>c</sup> and Sanja J. Armaković<sup>d</sup>

<sup>a</sup> Chemistry Group, Manipal Centre for Natural Sciences, Manipal Academy of Higher Education, Manipal, Karnataka – 576 104, India.

<sup>b</sup> Department of Physics, TKM College of Arts and Science, Karicode, Kollam, Kerala, India.

<sup>c</sup> University of Novi Sad, Faculty of Sciences, Department of Physics, Trg D. Obradovića 4, 21000 Novi Sad, Serbia.

<sup>d</sup> University of Novi Sad, Faculty of Sciences, Department of Chemistry, Biochemistry and Environmental Protection, Trg D. Obradovića 3, 21000 Novi Sad, Serbia.

#### Contents

**Figure S1:** The FT-IR spectra of the **HL** and Cu(II) complexes, **1** and **2**.

**Figure S2:** The <sup>13</sup>C NMR spectrum of compound **HL**.

**Figure S3:** ESI-HRMS of complex **1**.

**Figure S4:** ESI-HRMS of complex **2**.

**Table S1:** Detection limit towards Cu<sup>2+</sup> ion sensing by various chemosensors.

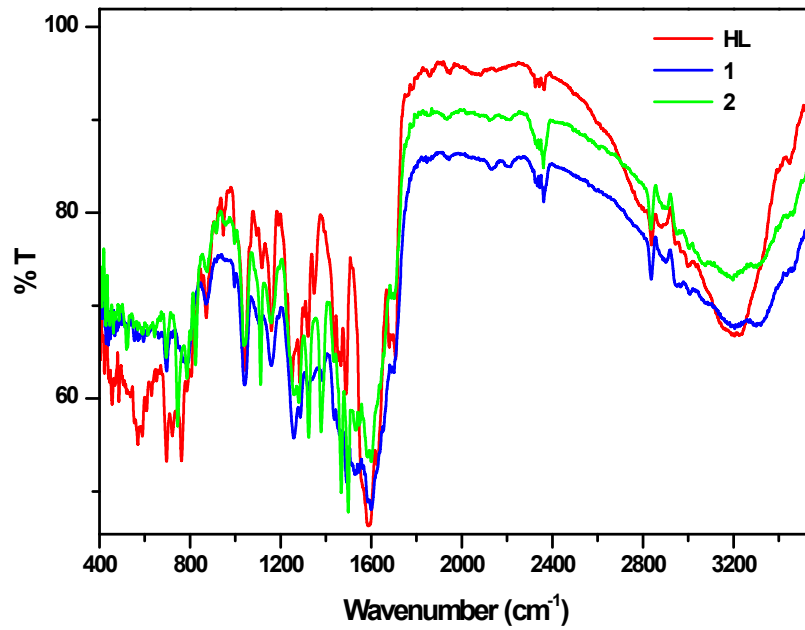

**Figure S1:** The FT-IR spectra of the HL and Cu(II) complexes, **1** and **2**.

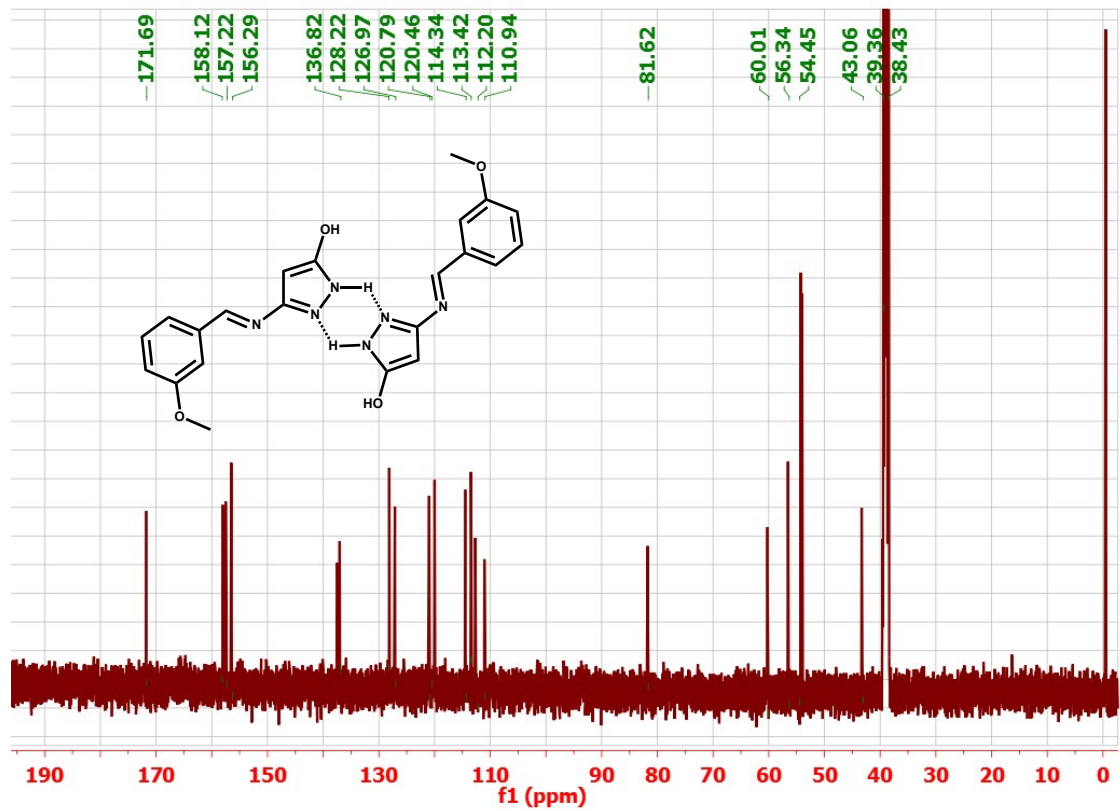

Figure S2: The  $^{13}\text{C}$  NMR spectrum of compound HL.

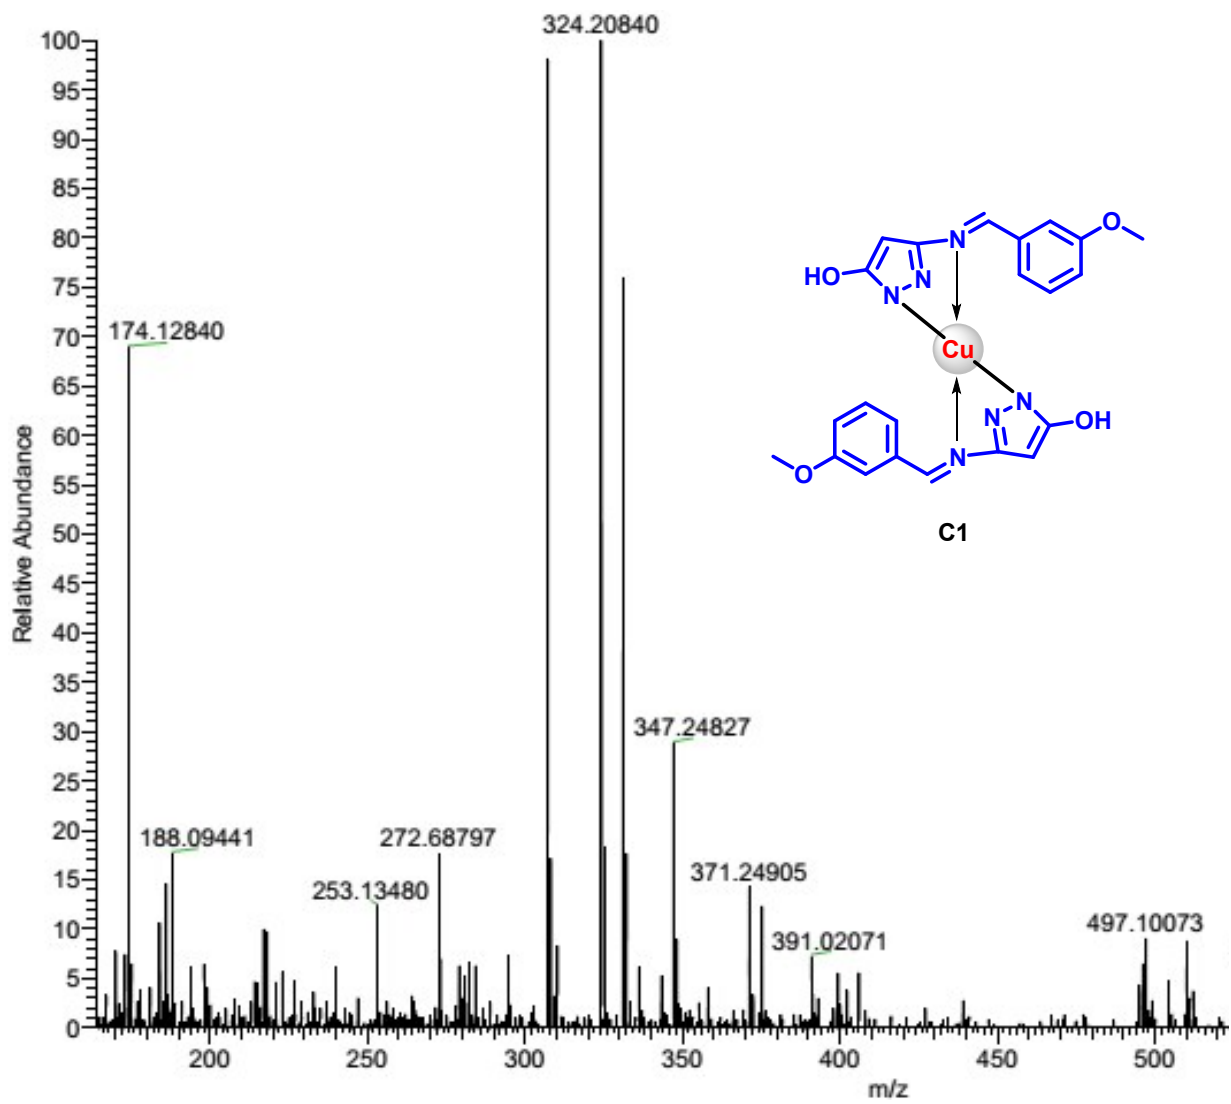

Figure S3: ESI-HRMS of complex 1.

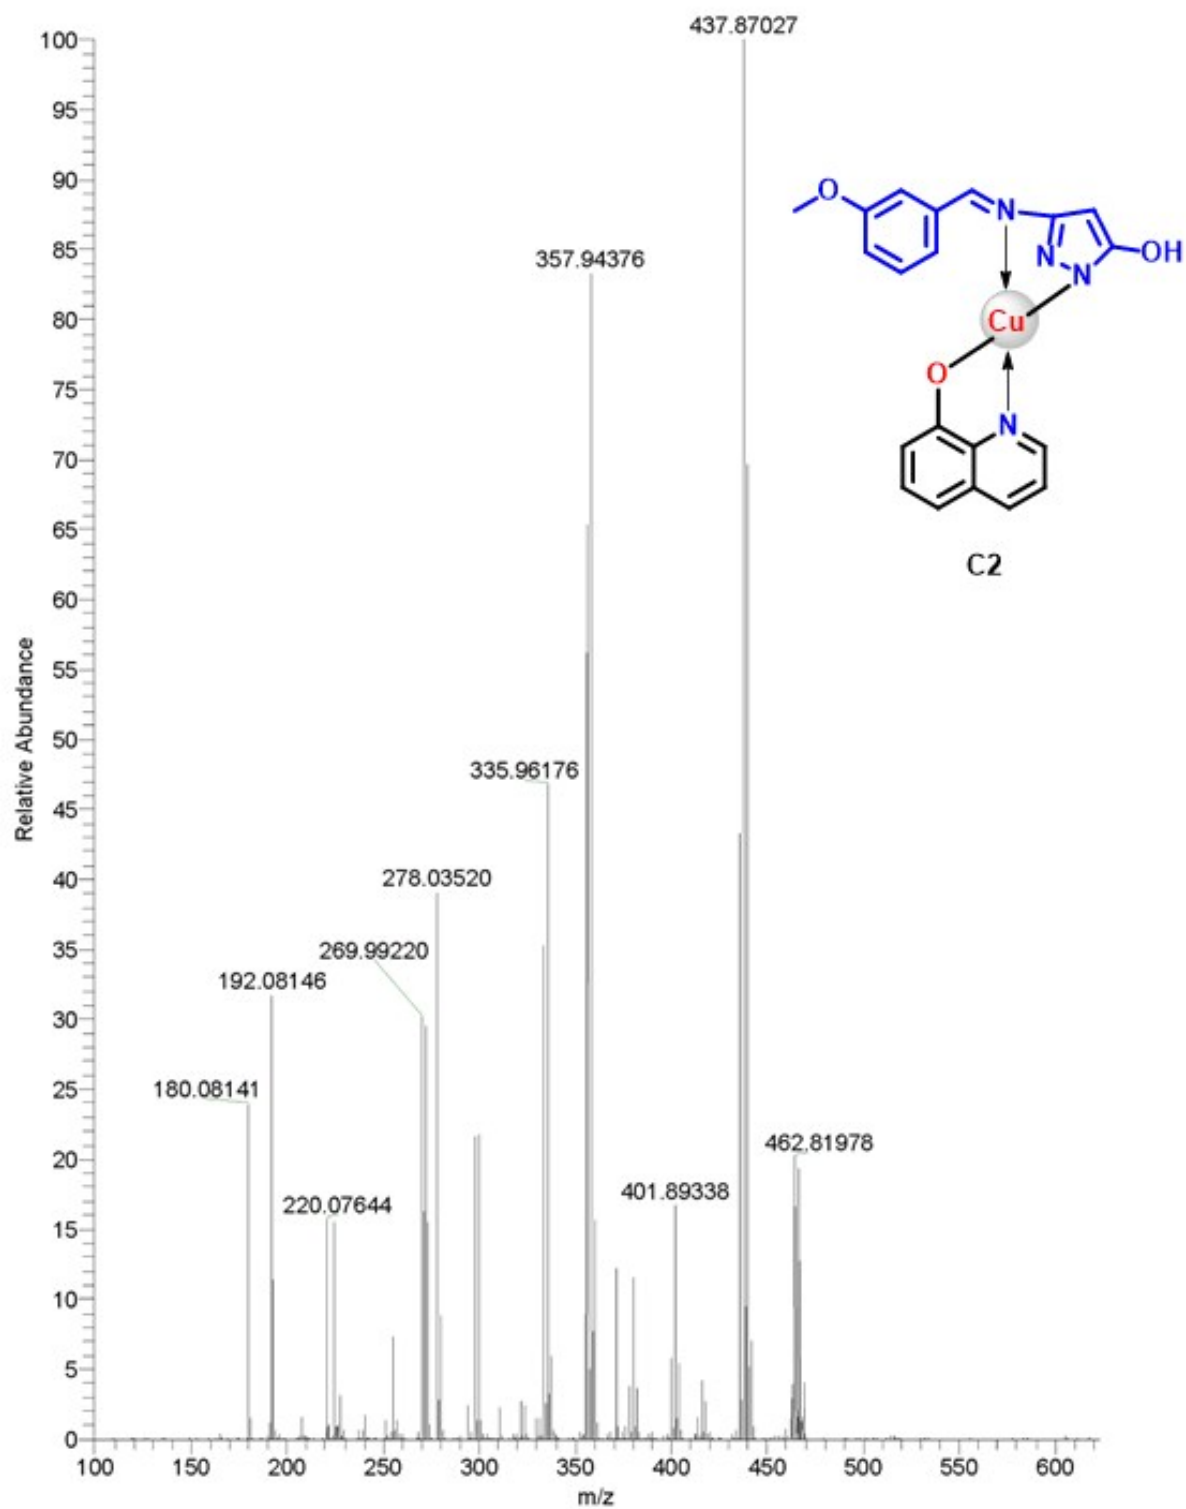

Figure S4: ESI-HRMS of complex 2.

**Table S1:** Detection limit towards Cu<sup>2+</sup> ion sensing by various chemosensors.

| Sensor reported in the literature                                                                                                                           | Lowest detecting ability of Cu <sup>2+</sup> ions from solution |
|-------------------------------------------------------------------------------------------------------------------------------------------------------------|-----------------------------------------------------------------|
| 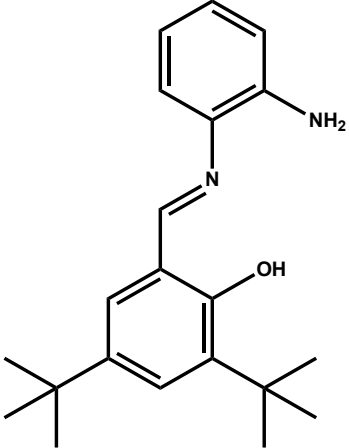 <p><b>Colorimetric sensor</b><br/>doi: 10.1080/00958972.2017.1420787</p>  | 1.66 μM                                                         |
|  <p><b>Colorimetric sensor</b><br/>doi: 10.1016/j.snb.2016.01.133</p>     | 2.9 μM                                                          |
|  <p><b>Colorimetric sensor</b><br/>doi: 10.1016/j.tetlet.2013.09.126</p> | 5 μM                                                            |

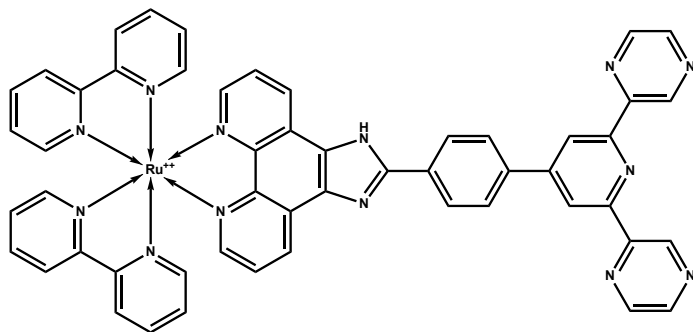

2.73  $\mu\text{M}$

**Fluorescence sensor**

doi: 10.1016/j.snb.2015.06.124

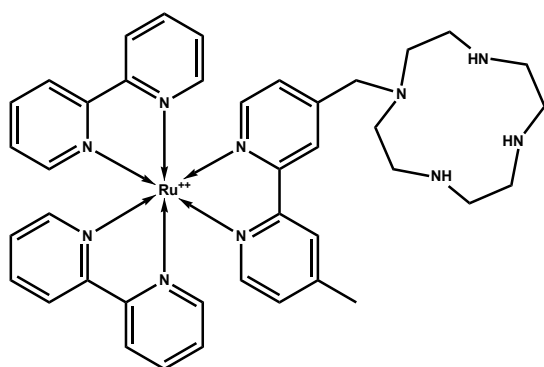

5.4  $\mu\text{M}$

**Fluorescence sensor**

doi:10.1039/C3DT51047F

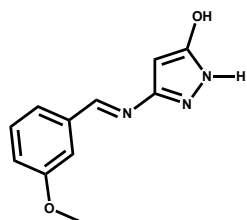

1.60  $\mu\text{M}$

**Our system**
